# Supplementary material for: Age-related increase of kynurenine enhances miR29b-1-5p to decrease both CXCL12 signaling and the epigenetic enzyme Hdac3 in bone marrow stromal cells
Source: PubMed Central journal article supplement — Bone Rep. 2020 Apr 23;12:100270. doi: 10.1016/j.bonr.2020.100270 (PMC7210406; doi:10.1016/j.bonr.2020.100270), 2020-04-23
Supplement: mmc1.pdf [file mmc1.pdf]

## Supplemental Data

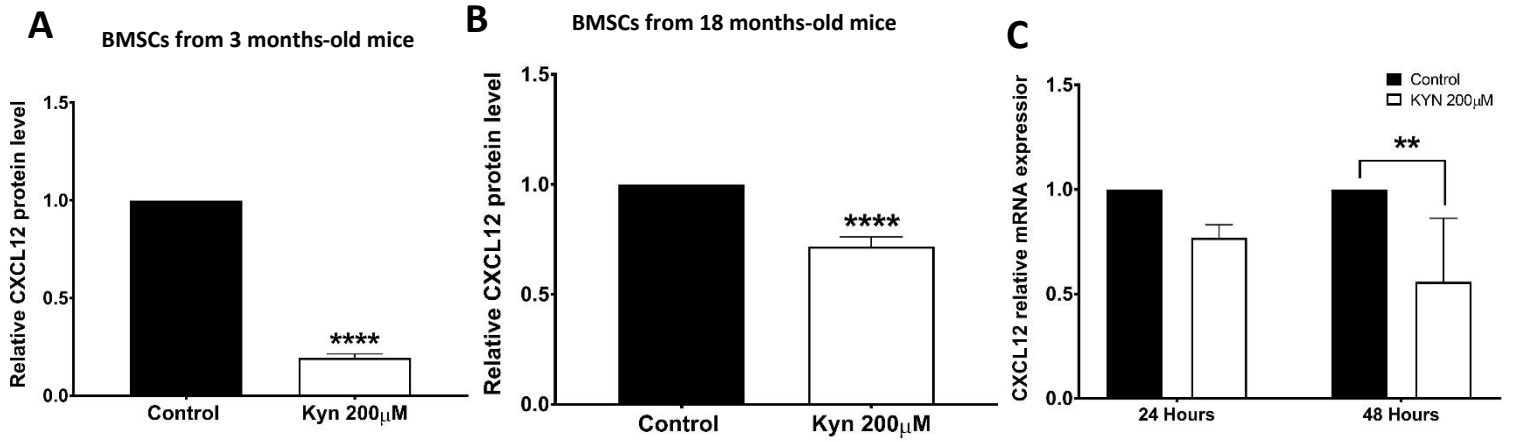

Supplementary Figure 1.

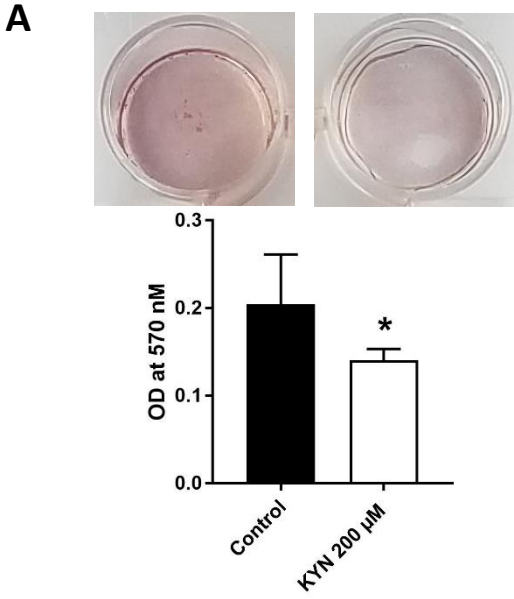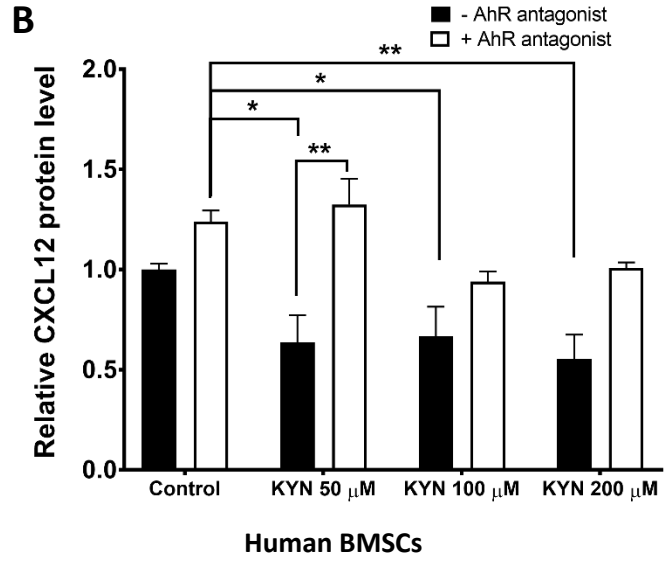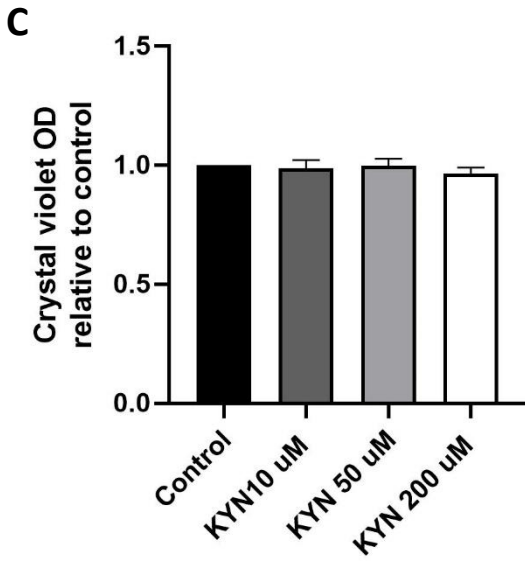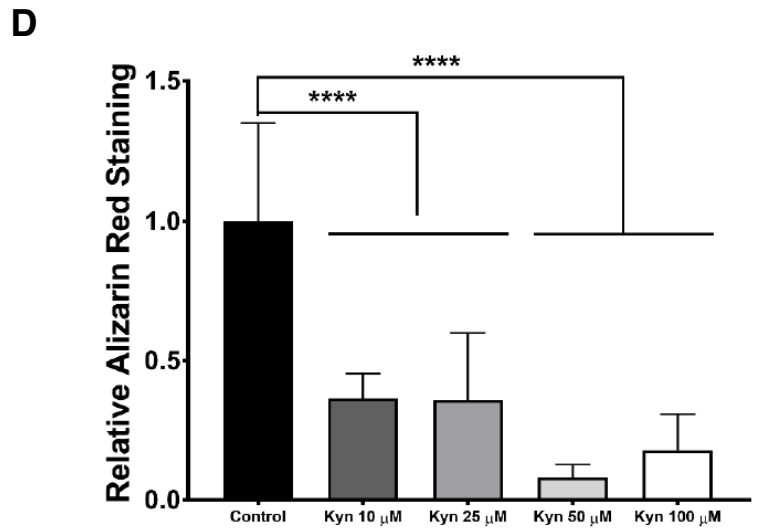

Supplementary Figure 2.

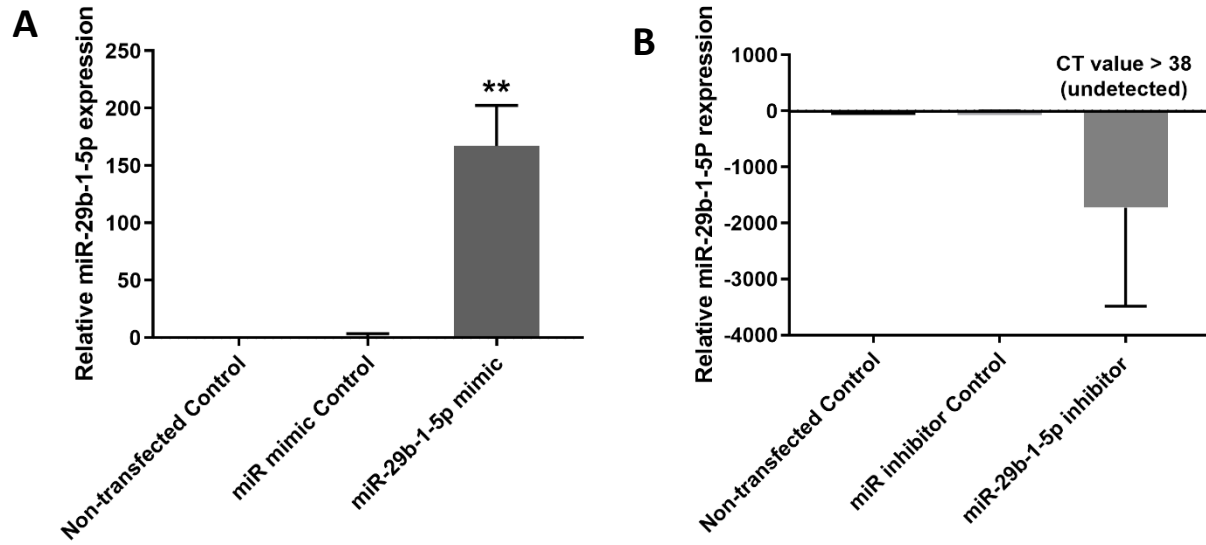

**C** *Cultured human MSCs (passage 1)*

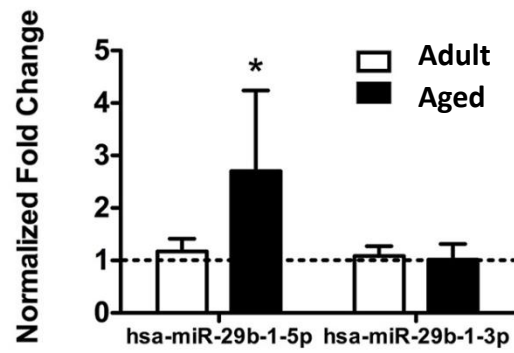

Supplementary Figure 3.
